# Supplementary material
Source: publisher figshare collection journal article supplement (https://gsajournals.figshare.com/ndownloader/files/12349478)
Supplement: Supplementary file 1 [file 12349478]

## Sheet: Sheet1
SIP Line	Sex	Number of replicates	Day bout number CVE	Day sleep CVE (min.)	Night bout number CVE	Night sleep CVE (min.)	24-hour sleep CVE (min.)	Waking activity CVE (cts./min.)	Sleep latency CVE (min.)	Day avg. bout length CVE (min.)	Night avg. bout length CVE (min.)
SIP_L1_1	Combined	4	26.4566	20.02	81.4756	4.75027	9.12405	21.0684	68.0965	41.5003	60.3397
SIP_L1_2	Combined	4	32.9599	16.6495	81.0372	2.75465	7.05673	19.3086	54.7065	38.6204	56.2016
SIP_L1_3	Combined	4	28.3357	25.0304	71.7539	3.6444	8.62144	21.761	55.8142	40.8327	60.4364
SIP_L1_4	Combined	4	25.2964	17.0615	78.7945	5.05864	8.56974	21.4427	71.9911	32.6013	77.3829
SIP_L1_5	Combined	4	34.3673	22.4489	98.1284	5.77847	11.0941	26.3529	61.4667	103.881	64.2042
SIP_L1_6	Combined	4	27.9536	20.1	87.4321	4.7064	9.85159	26.3577	75.5895	66.8022	53.71
SIP_L1_7	Combined	4	24.0697	20.9563	89.0289	7.01088	10.9311	23.056	66.2747	37.2058	69.0863
SIP_L1_8	Combined	4	30.4744	15.3061	70.4777	6.08927	8.2768	23.7716	63.3387	41.0677	82.9858
SIP_L1_9	Combined	4	22.5078	17.3192	80.2816	2.79829	7.23216	20.7806	57.3262	33.2878	61.2698
SIP_L1_10	Combined	4	33.3189	23.4059	86.6288	5.93079	9.83216	23.2576	72.5638	94.4938	74.205
SIP_L2_1	Combined	4	21.839	29.3086	46.9624	12.6583	16.0529	18.9151	67.2048	31.1346	92.2305
SIP_L2_2	Combined	4	33.9873	31.2648	61.3012	8.16739	13.8856	31.6051	70.8441	78.2221	103.548
SIP_L2_3	Combined	4	30.6601	23.0583	68.0526	5.20017	9.89977	27.8783	64.4911	63.312	64.7645
SIP_L2_4	Combined	4	27.5116	15.7712	61.6422	4.96091	8.80739	32.5851	84.629	87.2748	74.555
SIP_L2_5	Combined	4	29.8814	20.0967	58.5548	10.166	11.0129	19.975	84.8448	45.6558	92.2797
SIP_L2_6	Combined	4	31.6635	21.5664	68.9021	4.53136	10.1816	30.3412	59.4076	74.3882	69.7737
SIP_L2_7	Combined	4	30.9721	21.5329	68.0507	6.12278	10.638	21.7576	58.4179	53.0864	71.6981
SIP_L2_8	Combined	4	27.3776	21.4428	57.9436	6.17716	9.66023	24.8834	56.403	44.1388	59.7944
SIP_L2_10	Combined	4	28.6622	15.4173	72.2514	3.9817	7.57024	21.4543	45.2418	54.2238	67.4923
SIP_S1_1	Combined	4	68.8458	91.7038	49.146	59.8879	58.7209	16.2634	72.1447	39.1217	76.9054
SIP_S1_2	Combined	4	59.1094	72.032	61.0395	73.4467	60.2343	28.8769	74.1995	26.751	59.9656
SIP_S1_3	Combined	4	50.9055	60.7058	51.0792	70.7366	55.8511	29.6932	74.362	103.234	107.202
SIP_S1_4	Combined	4	31.5493	35.7483	36.7831	49.7853	30.7194	19.6204	56.8765	61.9224	78.3694
SIP_S1_5	Combined	4	41.0247	32.2893	44.5655	46.3427	31.1962	14.4936	67.752	55.1658	61.2046
SIP_S1_6	Combined	4	38.5577	53.5269	46.4724	54.3546	45.6976	14.9935	69.9021	32.1665	77.6227
SIP_S1_7	Combined	4	51.9832	63.6752	53.7351	75.593	59.1222	19.4212	83.295	39.5421	61.4891
SIP_S1_8	Combined	4	27.1313	36.2065	43.5535	42.321	33.1765	17.1634	82.6626	44.1212	84.1443
SIP_S1_9	Combined	4	45.2371	47.5138	46.1354	52.5149	42.436	18.6162	74.8087	31.6453	47.38
SIP_S1_10	Combined	4	57.7136	62.9877	61.4768	77.3825	56.4335	17.3411	61.8737	40.6869	83.7321
SIP_S2_1	Combined	4	84.0191	97.5435	94.9117	113.184	91.225	25.0775	54.8031	28.4904	39.1848
SIP_S2_2	Combined	4	76.4829	93.473	111.097	132.426	102.067	20.8439	51.3723	33.578	32.675
SIP_S2_3	Combined	4	42.0528	55.8607	60.6685	86.9715	59.112	18.683	50.135	38.0575	46.5997
SIP_S2_4	Combined	4	41.0887	59.0864	73.3951	97.6476	67.9277	22.276	65.8413	38.2928	69.1412
SIP_S2_5	Combined	4	57.1631	68.2697	84.1244	93.0897	62.5618	19.521	58.9543	30.4032	91.3137
SIP_S2_6	Combined	4	60.8727	76.0921	87.5622	108.205	80.4822	23.2444	57.2324	33.207	45.1696
SIP_S2_7	Combined	4	65.2669	79.5063	100.376	119.609	87.2322	23.3859	64.048	62.6867	90.5435
SIP_S2_8	Combined	4	78.0994	91.4954	84.1096	97.0713	84.7624	27.0573	51.4728	34.6463	51.6904
SIP_S2_9	Combined	4	75.0334	77.7223	72.0956	92.2925	74.2184	25.6271	56.7665	31.2047	37.0723
SIP_S2_10	Combined	4	49.0011	65.6337	62.7849	95.1632	69.5608	23.475	69.8411	48.8219	92.0255
SIP_L1_1	Female	2	20.9266	31.4782	88.3776	5.64716	13.1869	22.2917	72.7994	39.3699	68.8818
SIP_L1_2	Female	2	21.0281	25.1332	72.4997	4.14334	10.0873	16.7139	43.2781	41.1609	69.4579
SIP_L1_3	Female	2	28.9052	37.3496	85.6388	5.78334	11.6495	21.9601	56.0433	45.3036	71.4984
SIP_L1_4	Female	2	18.0714	22.3886	73.2373	7.65736	11.4388	19.5864	90.7398	29.8586	103.003
SIP_L1_5	Female	2	28.1231	30.4868	101.152	8.07051	15.0739	24.2128	71.7527	79.2731	71.7265
SIP_L1_6	Female	2	21.3966	24.7973	101.409	7.11888	12.5456	20.3088	90.3657	33.7773	61.822
SIP_L1_7	Female	2	20.0309	27.643	72.3228	7.9959	13.7625	22.4542	73.3391	33.3729	82.6556
SIP_L1_8	Female	2	19.1254	22.7208	65.6608	6.69593	11.1204	20.0578	65.8411	29.6325	93.6787
SIP_L1_9	Female	2	18.1516	24.779	89.1225	3.39133	9.71499	16.6251	54.301	31.3954	65.0604
SIP_L1_10	Female	2	29.8088	34.2316	77.8333	6.91111	12.3285	19.7762	61.0472	137.917	82.0402
SIP_L2_1	Female	2	22.0723	31.0625	58.4661	15.9685	17.7515	22.931	80.5544	25.1876	117.9
SIP_L2_2	Female	2	30.8449	38.3024	57.4529	8.83814	14.6781	22.2956	73.145	25.7916	91.6634
SIP_L2_3	Female	2	27.0823	29.5816	67.1571	6.46699	11.849	24.4096	62.4929	52.3424	69.0896
SIP_L2_4	Female	2	27.9368	19.4776	77.4047	2.67854	9.52109	43.897	84.7838	113.255	57.209
SIP_L2_5	Female	2	23.0682	22.5124	60.2347	13.7092	12.0218	17.5639	115.611	24.7362	84.5315
SIP_L2_6	Female	2	33.9244	23.5262	92.1264	3.82081	10.5164	42.4143	67.6775	99.8598	57.9217
SIP_L2_7	Female	2	32.8403	26.0095	78.5527	4.75418	11.1431	21.112	69.4193	60.8508	58.1821
SIP_L2_8	Female	2	25.7066	26.1315	54.159	4.60522	10.3278	32.7427	52.9603	44.091	57.6063
SIP_L2_10	Female	2	27.6415	19.3741	83.6602	2.07679	8.78704	26.4885	47.4553	67.9013	59.6455
SIP_S1_1	Female	2	84.3892	96.3347	49.4561	58.3591	59.2303	18.392	85.4989	19.3889	50.6945
SIP_S1_2	Female	2	68.9267	85.1412	53.0415	64.7646	58.5917	36.426	96.6697	22.1023	73.5361
SIP_S1_3	Female	2	56.24	72.6276	41.4749	60.9059	54.6853	27.3098	90.7543	143.34	147.319
SIP_S1_4	Female	2	31.1352	48.1261	29.7653	34.8334	29.0955	16.8947	52.2309	93.476	86.559
SIP_S1_5	Female	2	46.0967	40.1272	44.1118	42.6284	31.9844	12.3344	75.7574	32.2858	76.5606
SIP_S1_6	Female	2	45.6454	63.0933	35.6427	45.0762	44.3487	15.2127	77.7846	28.1044	60.632
SIP_S1_7	Female	2	64.2199	67.9118	45.1726	69.3768	59.3969	17.0427	87.0865	16.2302	53.3629
SIP_S1_8	Female	2	30.2673	39.7391	42.414	34.2563	31.6391	18.6295	98.6977	38.7154	100.479
SIP_S1_9	Female	2	50.8252	56.8427	40.7358	50.8227	46.3478	18.2028	68.824	26.8987	44.093
SIP_S1_10	Female	2	57.3088	65.5805	46.3286	69.9761	48.4707	15.3064	50.4135	16.4031	52.6256
SIP_S2_1	Female	2	115.146	121.571	84.553	98.5015	95.8575	27.3443	58.4481	23.1238	35.1514
SIP_S2_2	Female	2	101.114	119.665	137.912	163.489	135.885	22.3214	61.7222	15.2205	26.5707
SIP_S2_3	Female	2	50.7027	65.5185	47.2779	77.3503	65.8541	17.0208	54.4798	38.647	38.9909
SIP_S2_4	Female	2	54.8325	82.6866	87.0595	121.342	92.0444	21.0077	63.66	35.9105	70.0913
SIP_S2_5	Female	2	72.0141	87.624	64.4286	70.3316	65.0025	17.0308	72.8166	25.7588	132.908
SIP_S2_6	Female	2	85.6756	97.4896	90.6263	111.929	95.6404	22.7234	69.1089	23.7147	44.2559
SIP_S2_7	Female	2	89.4428	101.189	102.539	122.685	108.46	24.765	73.6	23.4485	39.0454
SIP_S2_8	Female	2	97.4849	112.245	75.8874	88.9505	93.1928	28.2372	55.7034	23.1139	36.0786
SIP_S2_9	Female	2	101.152	106.106	73.3504	91.3372	92.1023	26.9552	71.3393	34.9811	36.7764
SIP_S2_10	Female	2	62.6115	83.427	54.0857	73.951	73.3601	15.0456	75.7388	33.2115	38.0991
SIP_L1_1	Male	2	31.9867	8.56186	74.5737	3.85337	5.06121	19.8451	63.3935	43.6307	51.7977
SIP_L1_2	Male	2	44.8917	8.16587	89.5747	1.36595	4.02615	21.9033	66.1348	36.0798	42.9454
SIP_L1_3	Male	2	27.7662	12.7111	57.869	1.50545	5.59333	21.5619	55.5851	36.3617	49.3745
SIP_L1_4	Male	2	32.5214	11.7345	84.3516	2.45993	5.70063	23.2991	53.2425	35.344	51.7631
SIP_L1_5	Male	2	40.6116	14.411	95.1045	3.48643	7.11438	28.493	51.1807	128.488	56.6818
SIP_L1_6	Male	2	34.5106	15.4028	73.4553	2.29392	7.15763	32.4066	60.8133	99.8271	45.5979
SIP_L1_7	Male	2	28.1085	14.2696	105.735	6.02586	8.09974	23.6579	59.2102	41.0387	55.5171
SIP_L1_8	Male	2	41.8234	7.89128	75.2947	5.48262	5.43323	27.4854	60.8364	52.503	72.293
SIP_L1_9	Male	2	26.8639	9.85932	71.4407	2.20524	4.74934	24.936	60.3514	35.1803	57.4791
SIP_L1_10	Male	2	36.829	12.5802	95.4242	4.95047	7.33579	26.739	84.0803	51.0708	66.3699
SIP_L2_1	Male	2	21.6058	27.5547	35.4587	9.34822	14.3542	14.8992	53.8552	37.0817	66.561
SIP_L2_2	Male	2	37.1298	24.2272	65.1495	7.49665	13.0931	40.9146	68.5432	130.653	115.432
SIP_L2_3	Male	2	34.238	16.535	68.9482	3.93334	7.9506	31.347	66.4893	74.2817	60.4393
SIP_L2_4	Male	2	27.0864	12.0648	45.8798	7.24327	8.09369	21.2733	84.4741	61.2946	91.9011
SIP_L2_5	Male	2	36.6946	17.6811	56.875	6.62278	10.0041	22.3861	54.0785	66.5754	100.028
SIP_L2_6	Male	2	29.4027	19.6067	45.6778	5.24191	9.84671	18.2681	51.1377	48.9167	81.6257
SIP_L2_7	Male	2	29.1039	17.0562	57.5487	7.49139	10.1328	22.4032	47.4165	45.3219	85.214
SIP_L2_8	Male	2	29.0486	16.754	61.7282	7.74909	8.99262	17.0241	59.8458	44.1865	61.9825
SIP_L2_10	Male	2	29.6828	11.4605	60.8426	5.8866	6.35344	16.4201	43.0284	40.5462	75.3391
SIP_S1_1	Male	2	53.3024	87.073	48.836	61.4166	58.2114	14.1348	58.7905	58.8545	103.116
SIP_S1_2	Male	2	49.2921	58.9228	69.0374	82.1287	61.8768	21.3278	51.7294	31.3998	46.3952
SIP_S1_3	Male	2	45.571	48.784	60.6836	80.5673	57.0169	32.0767	57.9697	63.1287	67.0847
SIP_S1_4	Male	2	31.9635	23.3706	43.8009	64.7372	32.3433	22.346	61.5221	30.3687	70.1798
SIP_S1_5	Male	2	35.9526	24.4514	45.0193	50.0571	30.4079	16.6529	59.7466	78.0459	45.8486
SIP_S1_6	Male	2	31.47	43.9606	57.302	63.6331	47.0465	14.7743	62.0196	36.2287	94.6135
SIP_S1_7	Male	2	39.7465	59.4385	62.2975	81.8092	58.8474	21.7997	79.5035	62.8541	69.6153
SIP_S1_8	Male	2	23.9954	32.6738	44.6929	50.3857	34.7138	15.6972	66.6274	49.527	67.8101
SIP_S1_9	Male	2	39.649	38.1848	51.5349	54.2071	38.5242	19.0297	80.7933	36.3918	50.667
SIP_S1_10	Male	2	58.1185	60.395	76.6251	84.789	64.3963	19.3758	73.3339	64.9708	114.839
SIP_S2_1	Male	2	52.8923	73.5163	105.27	127.867	86.5926	22.8106	51.1582	33.857	43.2182
SIP_S2_2	Male	2	51.8514	67.2812	84.2827	101.364	68.2484	19.3663	41.0224	51.9355	38.7793
SIP_S2_3	Male	2	33.4029	46.203	74.059	96.5926	52.3698	20.3452	45.7902	37.4681	54.2085
SIP_S2_4	Male	2	27.3448	35.4863	59.7307	73.9529	43.811	23.5443	68.0225	40.6751	68.191
SIP_S2_5	Male	2	42.3121	48.9154	103.82	115.848	60.1212	22.0112	45.0921	35.0476	49.719
SIP_S2_6	Male	2	36.0698	54.6945	84.4982	104.481	65.324	23.7653	45.3559	42.6994	46.0833
SIP_S2_7	Male	2	41.091	57.8236	98.2135	116.532	66.0042	22.0068	54.496	101.925	142.042
SIP_S2_8	Male	2	58.7139	70.7461	92.3318	105.192	76.3321	25.8773	47.2422	46.1787	67.3022
SIP_S2_9	Male	2	48.9149	49.339	70.8408	93.2479	56.3345	24.2991	42.1937	27.4283	37.3682
SIP_S2_10	Male	2	35.3907	47.8404	71.4842	116.375	65.7614	31.9044	63.9435	64.4323	145.952
